# Supplementary material
Source: publisher site journal article supplement (https://www.e-cmh.org/upload/media/cmh-2023-0449-Supplementary-Table-5.pdf)
Supplement: Supplementary file 1 [file cmh-2023-0449-Supplementary-Table-5.pdf]

**Supplementary Table 5.** Expression and fold change levels in each stage specific enriched gene set

| Gene_id    | log2FC | P-value | Steatosis | MASH      | Steatosis_sd | MASH_sd  |
|------------|--------|---------|-----------|-----------|--------------|----------|
| A2MP1      | -0.489 | 0.015   | 7.760     | 10.933    | 6.824        | 7.016    |
| ABCB4      | -0.485 | 0.000   | 7289.350  | 10204.607 | 2508.975     | 3146.615 |
| ABCC4      | -0.703 | 0.000   | 226.724   | 369.354   | 78.818       | 131.188  |
| ACAT2      | -0.411 | 0.001   | 2263.755  | 3009.599  | 1118.377     | 1845.415 |
| ACHE       | -0.786 | 0.000   | 71.912    | 123.989   | 48.388       | 87.739   |
| ACKR1      | -0.992 | 0.000   | 4.187     | 8.128     | 4.079        | 6.747    |
| ACKR3      | -0.436 | 0.001   | 68.296    | 92.328    | 33.938       | 52.803   |
| ACP5       | -0.485 | 0.000   | 649.120   | 908.966   | 238.302      | 362.998  |
| ACSL4      | -0.824 | 0.000   | 598.262   | 1059.116  | 303.035      | 804.984  |
| ACSS2      | -0.407 | 0.001   | 2991.793  | 3966.255  | 1459.056     | 2715.009 |
| ADAM28     | -0.509 | 0.000   | 68.537    | 97.250    | 30.930       | 48.356   |
| ADAMDEC1   | -0.957 | 0.000   | 4.323     | 8.454     | 6.028        | 8.435    |
| ADARB2     | -0.428 | 0.013   | 10.850    | 14.585    | 7.724        | 8.991    |
| ADORA1     | -0.575 | 0.000   | 7.299     | 10.960    | 4.941        | 6.188    |
| ADRA2A     | -0.666 | 0.000   | 19.272    | 30.451    | 11.882       | 18.559   |
| AEBP1      | -0.467 | 0.000   | 827.749   | 1143.973  | 416.500      | 716.518  |
| AGPAT4-IT1 | -0.379 | 0.018   | 10.687    | 13.794    | 7.471        | 6.765    |
| AIM1L      | -0.883 | 0.001   | 2.836     | 5.055     | 4.731        | 4.058    |
| AJUBA      | -0.680 | 0.000   | 905.242   | 1450.599  | 326.994      | 479.795  |
| ALG1L      | -0.822 | 0.001   | 5.808     | 10.260    | 4.882        | 8.099    |
| ALOX15B    | -1.099 | 0.000   | 3.057     | 6.319     | 3.638        | 5.123    |
| ALOX5AP    | -0.389 | 0.002   | 24.584    | 32.136    | 10.834       | 16.168   |
| ANAPC1P1   | -0.729 | 0.008   | 1.700     | 2.739     | 1.885        | 2.621    |
| ANKRD29    | -0.673 | 0.000   | 62.592    | 99.720    | 32.513       | 49.681   |
| ANKRD36BP2 | -0.650 | 0.000   | 22.375    | 35.031    | 13.809       | 22.971   |
| ANLN       | -0.622 | 0.000   | 42.687    | 65.793    | 39.338       | 44.830   |
| ANTXRPL1   | -0.511 | 0.007   | 4.132     | 5.860     | 3.744        | 3.463    |
| ANXA2      | -0.869 | 0.000   | 965.538   | 1763.636  | 524.602      | 1003.220 |
| ANXA5      | -0.413 | 0.000   | 1521.279  | 2025.781  | 543.801      | 831.352  |
| AOAH-IT1   | -0.575 | 0.008   | 3.725     | 5.534     | 3.618        | 4.154    |
| AP1M2      | -0.514 | 0.004   | 8.843     | 12.609    | 6.276        | 9.842    |
| APOBEC3B   | -0.814 | 0.000   | 5.652     | 9.982     | 5.868        | 8.041    |
| APOL3      | -0.699 | 0.000   | 1143.541  | 1857.044  | 562.596      | 843.057  |
| AQP4       | -0.702 | 0.000   | 75.639    | 122.975   | 45.690       | 65.123   |
| AQP4-AS1   | -0.405 | 0.014   | 20.124    | 26.487    | 16.265       | 15.076   |
| ARHGAP11A  | -0.391 | 0.000   | 72.517    | 94.968    | 37.363       | 37.752   |
| ARHGEF38   | -0.477 | 0.001   | 21.350    | 29.600    | 12.927       | 20.171   |
| ARPP21     | -0.569 | 0.002   | 45.258    | 67.149    | 42.000       | 45.140   |
| ASF1B      | -0.518 | 0.000   | 19.728    | 28.238    | 8.066        | 13.036   |
| ASPM       | -0.525 | 0.000   | 319.717   | 459.842   | 166.956      | 200.255  |
| ATP10A     | -0.416 | 0.000   | 47.411    | 63.016    | 22.055       | 26.117   |

**Supplementary Table 5.** Continued

| Gene_id     | log2FC | P-value | Steatosis | MASH     | Steatosis_sd | MASH_sd |
|-------------|--------|---------|-----------|----------|--------------|---------|
| ATP2C2      | -0.473 | 0.010   | 7.889     | 11.042   | 4.914        | 8.982   |
| ATP6V0D2    | -1.920 | 0.000   | 2.157     | 8.092    | 2.991        | 6.934   |
| AURKB       | -0.532 | 0.001   | 8.457     | 12.173   | 6.206        | 7.699   |
| B3GALT5     | -0.408 | 0.026   | 12.069    | 15.997   | 10.746       | 11.447  |
| B3GNT3      | -0.531 | 0.003   | 18.241    | 26.280   | 16.573       | 18.909  |
| B3GNT5      | -0.589 | 0.000   | 49.680    | 74.714   | 30.896       | 48.715  |
| BCAT1       | -1.170 | 0.000   | 116.092   | 261.123  | 70.405       | 189.498 |
| BCL2A1      | -0.390 | 0.009   | 22.707    | 29.686   | 13.898       | 18.744  |
| BDKRB2      | -0.535 | 0.006   | 9.022     | 13.053   | 6.399        | 11.940  |
| BHLHE41     | -0.722 | 0.000   | 21.025    | 34.434   | 10.270       | 19.179  |
| BICC1       | -0.547 | 0.000   | 253.421   | 370.123  | 122.872      | 208.506 |
| BIRC3       | -0.412 | 0.000   | 842.571   | 1121.060 | 451.616      | 499.607 |
| BIRC5       | -0.485 | 0.001   | 32.590    | 45.640   | 21.296       | 28.902  |
| BLM         | -0.392 | 0.001   | 28.464    | 37.265   | 15.196       | 14.844  |
| BMP5        | -0.379 | 0.000   | 103.030   | 133.946  | 40.198       | 43.085  |
| BOLL        | -0.535 | 0.006   | 4.553     | 6.503    | 3.673        | 4.498   |
| BTLA        | -0.397 | 0.001   | 26.431    | 34.562   | 13.360       | 17.703  |
| BUB1        | -0.577 | 0.000   | 24.763    | 37.081   | 21.088       | 22.660  |
| BUB1B       | -0.792 | 0.000   | 20.042    | 34.790   | 16.227       | 21.267  |
| C10orf90    | -0.757 | 0.000   | 3.037     | 5.109    | 2.748        | 4.870   |
| C11orf45    | -0.397 | 0.001   | 23.747    | 31.351   | 12.490       | 12.810  |
| C11orf63    | -0.455 | 0.000   | 19.659    | 26.706   | 10.049       | 11.365  |
| C12orf75    | -0.389 | 0.002   | 29.955    | 39.137   | 12.052       | 25.001  |
| C15orf48    | -1.281 | 0.000   | 6.658     | 16.279   | 4.962        | 14.283  |
| C15orf54    | -0.431 | 0.014   | 30.890    | 41.473   | 24.686       | 27.290  |
| C17orf51    | -0.426 | 0.000   | 215.389   | 289.234  | 117.844      | 144.079 |
| C1QBP       | -0.662 | 0.001   | 2.869     | 4.486    | 2.853        | 3.000   |
| C1QC        | -0.711 | 0.000   | 13.922    | 22.744   | 10.806       | 18.943  |
| C1QTNF1-AS1 | -0.420 | 0.001   | 29.245    | 39.063   | 16.474       | 19.594  |
| C1orf140    | -0.503 | 0.005   | 6.009     | 8.628    | 5.302        | 4.360   |
| C20orf197   | -0.414 | 0.049   | 7.096     | 9.049    | 7.206        | 6.621   |
| C2CD4A      | -0.650 | 0.004   | 5.235     | 8.117    | 5.533        | 5.902   |
| C7orf76     | -0.400 | 0.000   | 90.777    | 119.899  | 35.418       | 42.293  |
| C9orf106    | -0.607 | 0.012   | 6.250     | 9.439    | 7.802        | 6.623   |
| C9orf152    | -0.718 | 0.002   | 8.007     | 13.314   | 9.133        | 12.227  |
| CADPS       | -0.620 | 0.007   | 7.280     | 11.192   | 7.956        | 8.954   |
| CAP2        | -0.382 | 0.000   | 82.216    | 106.817  | 32.103       | 32.100  |
| CAPG        | -1.215 | 0.000   | 73.974    | 171.742  | 40.943       | 102.408 |
| CASP1P2     | -0.730 | 0.009   | 1.730     | 2.903    | 2.253        | 2.427   |
| CASR        | -0.393 | 0.025   | 11.683    | 15.295   | 9.320        | 13.026  |

**Supplementary Table 5.** Continued

| Gene_id | log2FC | P-value | Steatosis | MASH     | Steatosis_sd | MASH_sd  |
|---------|--------|---------|-----------|----------|--------------|----------|
| CBX2    | -0.421 | 0.001   | 28.840    | 38.746   | 15.789       | 18.998   |
| CCDC64  | -0.451 | 0.000   | 61.011    | 83.517   | 44.807       | 35.747   |
| CCL18   | -0.872 | 0.000   | 15.444    | 28.211   | 11.101       | 18.499   |
| CCL22   | -0.478 | 0.003   | 13.393    | 18.642   | 8.983        | 11.177   |
| CCNA2   | -0.423 | 0.000   | 58.506    | 78.270   | 28.587       | 36.216   |
| CCNB1   | -0.531 | 0.000   | 55.674    | 80.682   | 26.860       | 46.505   |
| CCNB2   | -0.728 | 0.000   | 13.947    | 23.322   | 10.862       | 15.613   |
| CCND1   | -0.496 | 0.000   | 2994.086  | 4221.928 | 1179.800     | 1306.260 |
| CCNE1   | -0.412 | 0.001   | 12.668    | 16.695   | 6.976        | 6.857    |
| CCNI2   | -0.545 | 0.002   | 4.569     | 6.597    | 3.294        | 3.904    |
| CCR4    | -0.522 | 0.000   | 13.258    | 18.965   | 7.403        | 10.684   |
| CCR5    | -0.517 | 0.000   | 90.377    | 129.293  | 36.709       | 48.697   |
| CCRL2   | -0.640 | 0.000   | 22.394    | 34.939   | 12.821       | 19.640   |
| CD1B    | -1.164 | 0.000   | 1.829     | 4.094    | 2.534        | 2.976    |
| CD1E    | -0.467 | 0.002   | 21.271    | 29.333   | 14.439       | 17.445   |
| CD2     | -0.472 | 0.000   | 81.133    | 112.412  | 34.632       | 46.346   |
| CD207   | -0.401 | 0.019   | 12.723    | 16.690   | 8.973        | 9.965    |
| CD24    | -0.823 | 0.000   | 398.100   | 703.884  | 224.651      | 470.113  |
| CD3D    | -0.418 | 0.002   | 32.651    | 43.685   | 17.335       | 22.508   |
| CD3E    | -0.384 | 0.000   | 40.282    | 52.571   | 16.464       | 22.170   |
| CD3G    | -0.453 | 0.000   | 20.731    | 28.413   | 8.962        | 11.228   |
| CD40LG  | -0.450 | 0.000   | 15.130    | 20.411   | 8.204        | 8.947    |
| CD52    | -0.650 | 0.000   | 85.545    | 134.373  | 54.536       | 82.121   |
| CD6     | -0.386 | 0.000   | 54.422    | 71.086   | 20.612       | 27.872   |
| CD72    | -0.406 | 0.000   | 57.116    | 75.664   | 24.389       | 33.558   |
| CD79A   | -0.556 | 0.000   | 11.252    | 16.554   | 6.181        | 9.012    |
| CD83    | -0.442 | 0.000   | 152.500   | 206.945  | 90.183       | 92.096   |
| CD84    | -0.442 | 0.000   | 531.780   | 722.671  | 218.038      | 277.084  |
| CD8B    | -0.505 | 0.001   | 19.761    | 28.010   | 14.421       | 16.233   |
| CD96    | -0.466 | 0.000   | 107.569   | 148.528  | 34.888       | 48.467   |
| CDC20   | -0.822 | 0.000   | 12.337    | 21.923   | 10.710       | 18.325   |
| CDC25A  | -0.496 | 0.000   | 26.004    | 36.907   | 11.174       | 16.697   |
| CDC25C  | -0.870 | 0.000   | 6.300     | 11.704   | 6.393        | 9.346    |
| CDC45   | -1.229 | 0.000   | 9.331     | 21.992   | 8.140        | 15.162   |
| CDC6    | -0.821 | 0.000   | 38.046    | 67.355   | 24.397       | 33.840   |
| CDC7    | -0.618 | 0.000   | 48.363    | 74.046   | 21.928       | 29.281   |
| CDCA2   | -0.604 | 0.000   | 14.387    | 21.895   | 10.587       | 13.832   |
| CDCA7   | -0.593 | 0.001   | 4.968     | 7.520    | 4.048        | 5.057    |
| CDCA8   | -0.486 | 0.000   | 15.928    | 22.430   | 8.114        | 10.534   |
| CDCP1   | -0.542 | 0.000   | 54.018    | 78.070   | 27.356       | 34.358   |

**Supplementary Table 5.** Continued

| Gene_id    | log2FC | P-value | Steatosis | MASH      | Steatosis_sd | MASH_sd  |
|------------|--------|---------|-----------|-----------|--------------|----------|
| CDH11      | -0.407 | 0.015   | 105.638   | 139.910   | 62.741       | 120.791  |
| CDH6       | -0.622 | 0.000   | 129.336   | 198.955   | 100.646      | 144.258  |
| CDK1       | -0.563 | 0.001   | 37.092    | 54.877    | 28.543       | 38.821   |
| CDKN1A     | -0.382 | 0.003   | 836.666   | 1090.548  | 565.015      | 504.712  |
| CDKN2B     | -0.451 | 0.000   | 42.514    | 57.988    | 16.629       | 36.755   |
| CDKN2B-AS1 | -0.604 | 0.002   | 4.076     | 6.036     | 3.491        | 4.525    |
| CDKN3      | -0.797 | 0.000   | 7.643     | 13.434    | 7.335        | 11.657   |
| CDT1       | -0.572 | 0.000   | 27.667    | 41.105    | 20.066       | 21.150   |
| CECR1      | -0.413 | 0.000   | 485.502   | 646.394   | 151.564      | 195.365  |
| CENPA      | -0.536 | 0.029   | 4.380     | 6.354     | 4.783        | 5.392    |
| CENPE      | -0.385 | 0.002   | 68.435    | 89.411    | 40.403       | 47.285   |
| CENPF      | -0.508 | 0.000   | 143.286   | 203.928   | 96.502       | 110.514  |
| CENPI      | -0.721 | 0.000   | 15.039    | 25.038    | 9.402        | 16.471   |
| CENPK      | -0.680 | 0.000   | 15.154    | 24.257    | 10.332       | 13.044   |
| CENPM      | -1.000 | 0.000   | 6.322     | 12.460    | 6.470        | 10.273   |
| CENPU      | -0.452 | 0.000   | 84.008    | 114.689   | 39.610       | 51.886   |
| CEP55      | -0.504 | 0.006   | 10.964    | 15.626    | 9.591        | 12.779   |
| CFAP221    | -0.986 | 0.000   | 16.051    | 31.835    | 16.272       | 22.438   |
| CHAF1B     | -0.413 | 0.000   | 21.306    | 28.187    | 8.843        | 10.495   |
| CHEK1      | -0.380 | 0.000   | 71.492    | 93.086    | 22.113       | 31.028   |
| CHI3L1     | -0.801 | 0.001   | 397.151   | 691.838   | 586.221      | 664.833  |
| CHODL      | -0.528 | 0.034   | 1.868     | 2.540     | 2.272        | 1.887    |
| CHST4      | -0.446 | 0.000   | 165.479   | 225.371   | 96.130       | 124.080  |
| CHST9      | -0.710 | 0.000   | 256.790   | 420.167   | 145.763      | 222.684  |
| CIB2       | -0.380 | 0.016   | 6.561     | 8.470     | 4.330        | 4.880    |
| CILP       | -0.389 | 0.000   | 135.909   | 177.777   | 42.570       | 63.752   |
| CILP2      | -0.923 | 0.000   | 4.321     | 8.119     | 5.287        | 7.905    |
| CKAP2L     | -0.645 | 0.000   | 20.305    | 31.739    | 14.647       | 17.682   |
| CKS2       | -0.420 | 0.000   | 71.921    | 96.360    | 30.984       | 39.925   |
| CLDN10     | -0.587 | 0.000   | 64.316    | 96.487    | 45.198       | 84.470   |
| CLDN11     | -0.614 | 0.000   | 57.469    | 87.719    | 28.322       | 47.380   |
| CLDN4      | -0.397 | 0.006   | 28.418    | 37.364    | 20.829       | 24.948   |
| CLDN7      | -0.383 | 0.000   | 128.745   | 168.015   | 38.783       | 49.492   |
| CLEC5A     | -0.575 | 0.001   | 8.973     | 13.325    | 6.213        | 10.196   |
| CLIC6      | -0.689 | 0.000   | 21.864    | 35.219    | 21.736       | 24.875   |
| CLSPN      | -0.870 | 0.000   | 20.379    | 37.347    | 14.147       | 18.572   |
| CMTM1      | -0.706 | 0.000   | 4.811     | 7.866     | 4.177        | 4.631    |
| COL1A2     | -0.404 | 0.003   | 2281.564  | 3019.447  | 1638.277     | 1976.967 |
| COL22A1    | -0.527 | 0.028   | 3.358     | 4.735     | 3.683        | 3.986    |
| COL3A1     | -0.432 | 0.000   | 7715.047  | 10405.344 | 5161.756     | 5819.148 |

**Supplementary Table 5.** Continued

| Gene_id  | log2FC | P-value | Steatosis | MASH      | Steatosis_sd | MASH_sd   |
|----------|--------|---------|-----------|-----------|--------------|-----------|
| CPZ      | -0.634 | 0.000   | 29.759    | 46.057    | 19.049       | 43.209    |
| CRH      | -0.718 | 0.006   | 3.302     | 5.457     | 4.027        | 4.130     |
| CRTAM    | -0.430 | 0.001   | 18.876    | 25.441    | 10.925       | 13.760    |
| CRYM     | -0.466 | 0.000   | 229.577   | 317.476   | 117.804      | 129.196   |
| CSPG5    | -0.758 | 0.000   | 4.219     | 7.093     | 3.213        | 4.411     |
| CTSW     | -0.478 | 0.001   | 39.711    | 55.395    | 22.371       | 27.923    |
| CXCL10   | -1.197 | 0.000   | 201.926   | 462.826   | 178.272      | 417.445   |
| CXCL9    | -0.602 | 0.001   | 288.988   | 438.513   | 368.084      | 365.144   |
| CXCR3    | -0.673 | 0.000   | 12.380    | 19.791    | 6.766        | 9.957     |
| CYP51A1  | -0.469 | 0.002   | 9575.849  | 13252.647 | 6051.212     | 10371.392 |
| DAGLA    | -0.456 | 0.000   | 35.020    | 47.916    | 16.847       | 21.015    |
| DCANP1   | -0.460 | 0.000   | 17.064    | 23.501    | 9.632        | 11.100    |
| DCDC2    | -0.603 | 0.000   | 162.930   | 247.305   | 126.171      | 176.001   |
| DEPDC1   | -1.049 | 0.000   | 17.604    | 36.457    | 18.312       | 33.976    |
| DEPDC1B  | -0.664 | 0.000   | 13.404    | 21.271    | 9.291        | 11.118    |
| DERL3    | -0.489 | 0.000   | 52.393    | 73.284    | 33.370       | 37.809    |
| DGKI     | -0.420 | 0.047   | 3.462     | 4.557     | 3.170        | 3.391     |
| DHCR7    | -0.550 | 0.000   | 1908.415  | 2795.160  | 1038.059     | 1804.702  |
| DHRS9    | -0.950 | 0.000   | 55.175    | 106.423   | 27.702       | 56.482    |
| DIAPH3   | -0.466 | 0.014   | 14.085    | 19.542    | 13.075       | 14.870    |
| DIRAS2   | -0.512 | 0.001   | 13.673    | 19.378    | 9.091        | 13.656    |
| DISC1FP1 | -0.753 | 0.001   | 2.477     | 4.139     | 2.706        | 3.006     |
| DKK3     | -0.421 | 0.001   | 213.908   | 286.329   | 98.555       | 158.638   |
| DLGAP5   | -0.669 | 0.000   | 15.898    | 25.381    | 16.527       | 20.441    |
| DNAJC5B  | -0.845 | 0.000   | 7.275     | 13.022    | 5.167        | 8.494     |
| DNASE2B  | -1.451 | 0.000   | 2.030     | 5.271     | 2.398        | 5.145     |
| DOCK11   | -0.454 | 0.000   | 445.839   | 610.922   | 133.585      | 224.222   |
| DOCK3    | -0.462 | 0.000   | 36.485    | 50.242    | 17.216       | 15.078    |
| DPP10    | -0.425 | 0.007   | 14.492    | 19.345    | 8.115        | 12.517    |
| DTL      | -1.215 | 0.000   | 29.668    | 68.919    | 23.041       | 42.303    |
| DTNA     | -1.372 | 0.000   | 70.828    | 183.132   | 77.401       | 157.181   |
| DUSP8    | -1.388 | 0.000   | 15.434    | 40.351    | 16.291       | 35.775    |
| E2F1     | -1.155 | 0.000   | 26.722    | 59.454    | 20.351       | 40.490    |
| E2F2     | -0.692 | 0.000   | 12.279    | 19.891    | 9.148        | 12.536    |
| E2F7     | -0.583 | 0.001   | 10.349    | 15.376    | 9.738        | 9.001     |
| E2F8     | -1.128 | 0.000   | 8.620     | 18.726    | 8.887        | 12.931    |
| ECT2     | -0.547 | 0.000   | 92.917    | 135.805   | 42.094       | 52.169    |
| EDA2R    | -0.680 | 0.001   | 17.287    | 27.492    | 14.051       | 23.730    |
| EDN2     | -0.499 | 0.004   | 13.676    | 19.283    | 11.251       | 11.242    |
| EHF      | -0.408 | 0.001   | 223.437   | 296.264   | 130.502      | 191.350   |

**Supplementary Table 5.** Continued

| Gene_id   | log2FC | P-value | Steatosis | MASH     | Steatosis_sd | MASH_sd  |
|-----------|--------|---------|-----------|----------|--------------|----------|
| ELOVL2    | -0.523 | 0.000   | 1840.987  | 2645.954 | 919.261      | 1287.346 |
| ELOVL7    | -0.453 | 0.000   | 42.430    | 57.959   | 23.795       | 36.472   |
| EME1      | -0.607 | 0.000   | 12.710    | 19.263   | 7.271        | 7.777    |
| EMILIN2   | -0.510 | 0.000   | 128.750   | 183.378  | 68.848       | 68.174   |
| EMP1      | -0.513 | 0.000   | 136.085   | 194.231  | 85.400       | 114.063  |
| ENKUR     | -0.443 | 0.000   | 18.067    | 24.399   | 8.212        | 10.332   |
| ENPP2     | -0.439 | 0.018   | 497.021   | 673.709  | 346.834      | 628.684  |
| ENPP5     | -0.400 | 0.003   | 28.291    | 37.092   | 14.552       | 25.702   |
| EPDR1     | -0.463 | 0.000   | 220.695   | 304.156  | 74.572       | 102.287  |
| EPHA1-AS1 | -0.482 | 0.002   | 23.242    | 32.167   | 17.655       | 17.390   |
| EPHA3     | -0.624 | 0.000   | 452.886   | 698.057  | 213.103      | 491.264  |
| EPHB2     | -0.668 | 0.000   | 39.611    | 63.128   | 18.903       | 30.753   |
| ESRP1     | -0.676 | 0.000   | 17.300    | 27.586   | 12.485       | 22.306   |
| ETV4      | -0.453 | 0.002   | 14.617    | 20.001   | 8.269        | 11.831   |
| ETV7      | -0.527 | 0.000   | 18.257    | 26.332   | 10.307       | 16.586   |
| EXO1      | -1.007 | 0.000   | 10.651    | 21.604   | 9.653        | 13.831   |
| F2RL1     | -0.396 | 0.000   | 193.758   | 254.981  | 83.943       | 97.086   |
| F2RL3     | -0.482 | 0.004   | 6.855     | 9.580    | 5.791        | 5.907    |
| F3        | -0.410 | 0.001   | 61.553    | 81.710   | 28.505       | 47.315   |
| FABP4     | -1.742 | 0.000   | 57.919    | 193.591  | 50.730       | 175.888  |
| FABP5     | -1.137 | 0.000   | 42.176    | 92.811   | 30.961       | 62.920   |
| FADS1     | -0.758 | 0.000   | 2596.597  | 4392.571 | 2176.186     | 4130.213 |
| FADS2     | -0.547 | 0.007   | 4200.127  | 6138.070 | 3289.394     | 4456.998 |
| FAM111B   | -1.319 | 0.000   | 58.300    | 145.484  | 56.166       | 89.765   |
| FAM169A   | -0.419 | 0.000   | 263.194   | 351.900  | 102.353      | 128.740  |
| FAM217A   | -0.639 | 0.005   | 3.200     | 4.908    | 3.559        | 3.595    |
| FAM71C    | -0.669 | 0.009   | 3.844     | 6.116    | 4.514        | 5.783    |
| FANCD2    | -0.389 | 0.000   | 83.393    | 109.111  | 30.539       | 36.240   |
| FAS-AS1   | -0.429 | 0.000   | 29.455    | 39.504   | 14.767       | 14.272   |
| FASLG     | -0.428 | 0.000   | 22.899    | 30.888   | 11.694       | 13.551   |
| FAT1      | -0.953 | 0.000   | 3928.258  | 7606.868 | 1818.867     | 3225.903 |
| FBXO2     | -0.510 | 0.000   | 326.268   | 464.860  | 171.670      | 198.961  |
| FCAMR     | -1.052 | 0.000   | 203.546   | 422.122  | 129.724      | 252.404  |
| FCGR1B    | -0.578 | 0.001   | 12.417    | 18.572   | 9.807        | 11.818   |
| FCGR1C    | -0.832 | 0.003   | 5.284     | 9.434    | 6.937        | 7.422    |
| FCGR2A    | -0.626 | 0.000   | 161.629   | 249.526  | 68.170       | 134.288  |
| FCGR2C    | -0.557 | 0.000   | 113.684   | 167.112  | 64.066       | 85.748   |
| FCRL2     | -0.572 | 0.001   | 7.225     | 10.790   | 4.733        | 7.525    |
| FCRL3     | -0.471 | 0.000   | 25.153    | 34.832   | 13.672       | 18.550   |
| FCRLA     | -0.467 | 0.004   | 6.686     | 9.112    | 3.942        | 5.752    |

**Supplementary Table 5.** Continued

| Gene_id  | log2FC | P-value | Steatosis | MASH     | Steatosis_sd | MASH_sd  |
|----------|--------|---------|-----------|----------|--------------|----------|
| FDFT1    | -0.408 | 0.001   | 1835.637  | 2436.103 | 804.946      | 1452.283 |
| FDP5     | -0.456 | 0.002   | 3223.257  | 4422.905 | 2052.904     | 2943.191 |
| FEN1     | -0.406 | 0.000   | 188.317   | 249.894  | 56.097       | 79.550   |
| FERMT1   | -0.438 | 0.000   | 28.509    | 38.628   | 13.312       | 20.859   |
| FHAD1    | -0.642 | 0.000   | 5.656     | 8.622    | 4.173        | 5.603    |
| FLJ38576 | -0.398 | 0.000   | 34.487    | 45.581   | 17.592       | 13.412   |
| FMN1     | -0.500 | 0.000   | 141.779   | 200.094  | 64.675       | 72.543   |
| FMO1     | -1.042 | 0.000   | 102.130   | 210.395  | 101.848      | 150.763  |
| FND5     | -0.399 | 0.007   | 1795.935  | 2368.389 | 1273.678     | 1160.422 |
| FOXL1    | -0.959 | 0.000   | 4.858     | 9.293    | 4.270        | 7.783    |
| FOXN4    | -0.501 | 0.038   | 24.230    | 34.082   | 35.453       | 28.955   |
| FOXP3    | -0.427 | 0.038   | 26.486    | 35.636   | 28.274       | 27.263   |
| FPR3     | -0.604 | 0.000   | 356.001   | 541.089  | 164.551      | 273.412  |
| FSTL3    | -0.531 | 0.000   | 174.948   | 252.581  | 97.289       | 134.950  |
| FXYD2    | -0.679 | 0.000   | 75.981    | 121.732  | 50.455       | 81.696   |
| GABRE    | -0.460 | 0.003   | 96.102    | 132.087  | 76.068       | 78.476   |
| GAPT     | -0.650 | 0.000   | 20.182    | 31.551   | 11.853       | 21.114   |
| GAS2L3   | -0.477 | 0.000   | 120.516   | 167.600  | 42.075       | 64.666   |
| GAS6-AS2 | -0.457 | 0.006   | 6.479     | 8.793    | 4.060        | 5.238    |
| GAS7     | -0.461 | 0.000   | 173.871   | 239.199  | 62.752       | 90.573   |
| GCNT4    | -0.406 | 0.000   | 66.686    | 88.219   | 41.112       | 39.322   |
| GDF15    | -0.431 | 0.005   | 58.521    | 78.877   | 46.881       | 51.118   |
| GEM      | -0.394 | 0.004   | 122.673   | 161.101  | 60.453       | 110.596  |
| GINS1    | -0.767 | 0.000   | 44.443    | 75.620   | 18.928       | 31.629   |
| GINS2    | -0.795 | 0.000   | 42.400    | 73.805   | 22.529       | 36.672   |
| GLDN     | -1.012 | 0.000   | 9.551     | 19.075   | 7.230        | 14.967   |
| GLI1     | -0.485 | 0.000   | 17.474    | 24.368   | 8.813        | 10.696   |
| GLI2     | -0.444 | 0.002   | 27.942    | 37.916   | 14.414       | 21.951   |
| GLIS2    | -0.460 | 0.000   | 77.420    | 106.417  | 39.773       | 65.499   |
| GOLGA7B  | -0.410 | 0.003   | 19.308    | 25.561   | 12.196       | 12.250   |
| GPC4     | -0.487 | 0.000   | 72.098    | 100.737  | 34.407       | 52.648   |
| GPNMB    | -1.044 | 0.000   | 781.814   | 1612.126 | 396.821      | 949.885  |
| GPR141   | -0.533 | 0.000   | 7.495     | 10.764   | 5.058        | 5.504    |
| GPR151   | -0.798 | 0.000   | 2.213     | 3.911    | 2.185        | 2.799    |
| GPR171   | -0.443 | 0.000   | 25.098    | 34.093   | 14.502       | 14.881   |
| GPR174   | -0.461 | 0.000   | 39.658    | 54.476   | 20.391       | 19.769   |
| GPR84    | -0.700 | 0.013   | 1.772     | 2.828    | 2.377        | 2.678    |
| GPRC5B   | -0.398 | 0.000   | 121.609   | 160.308  | 41.837       | 67.087   |
| GPRIN1   | -0.442 | 0.001   | 20.312    | 27.585   | 13.564       | 14.306   |
| GPRIN2   | -0.467 | 0.004   | 8.835     | 12.288   | 5.586        | 8.170    |

**Supplementary Table 5.** Continued

| Gene_id   | log2FC | P-value | Steatosis | MASH     | Steatosis_sd | MASH_sd |
|-----------|--------|---------|-----------|----------|--------------|---------|
| GPRIN3    | -0.382 | 0.000   | 273.174   | 355.646  | 102.269      | 126.636 |
| GPSM2     | -0.534 | 0.000   | 20.515    | 29.814   | 11.709       | 15.494  |
| GRHL2     | -0.474 | 0.001   | 36.703    | 50.970   | 22.813       | 34.196  |
| GRIN2D    | -0.507 | 0.002   | 7.478     | 10.688   | 5.463        | 5.673   |
| GSG2      | -0.478 | 0.003   | 7.400     | 10.310   | 5.012        | 6.033   |
| GTSE1     | -0.593 | 0.003   | 9.905     | 15.008   | 9.106        | 14.954  |
| GUCA2B    | -0.648 | 0.000   | 23.712    | 37.312   | 13.142       | 30.027  |
| GXYLT2    | -0.513 | 0.023   | 6.843     | 9.738    | 7.007        | 8.929   |
| GZMK      | -0.392 | 0.004   | 77.285    | 101.409  | 44.984       | 55.601  |
| H2AFY2    | -0.530 | 0.000   | 112.131   | 162.062  | 49.179       | 54.839  |
| HAPLN3    | -0.479 | 0.002   | 12.377    | 17.187   | 7.590        | 10.520  |
| HAVCR1    | -0.672 | 0.001   | 2.636     | 4.165    | 1.963        | 2.892   |
| HAVCR2    | -0.458 | 0.000   | 174.922   | 240.310  | 70.711       | 103.807 |
| HBA1      | -0.450 | 0.013   | 106.218   | 145.169  | 103.184      | 98.850  |
| HBB       | -0.415 | 0.013   | 872.826   | 1163.436 | 721.556      | 838.814 |
| HCG17     | -0.551 | 0.016   | 2.899     | 4.283    | 3.199        | 3.114   |
| HCST      | -0.493 | 0.000   | 36.060    | 50.825   | 12.738       | 23.851  |
| HECW1     | -1.219 | 0.000   | 8.864     | 20.388   | 7.441        | 16.165  |
| HELLS     | -0.649 | 0.000   | 94.264    | 147.621  | 46.310       | 58.379  |
| HIST1H1A  | -0.417 | 0.000   | 71.382    | 95.460   | 27.686       | 39.516  |
| HIST1H1B  | -0.452 | 0.001   | 136.664   | 187.103  | 88.300       | 115.108 |
| HIST1H2AB | -0.631 | 0.000   | 34.212    | 53.228   | 18.100       | 27.304  |
| HIST1H2AG | -0.480 | 0.001   | 80.565    | 112.509  | 47.161       | 69.538  |
| HIST1H2AH | -0.684 | 0.000   | 31.321    | 50.511   | 23.172       | 30.722  |
| HIST1H2AI | -0.500 | 0.002   | 36.803    | 52.168   | 26.348       | 34.812  |
| HIST1H2AJ | -0.654 | 0.000   | 23.965    | 37.811   | 16.819       | 28.389  |
| HIST1H2AL | -0.485 | 0.002   | 29.728    | 41.713   | 21.555       | 24.664  |
| HIST1H2AM | -0.413 | 0.000   | 80.996    | 108.049  | 38.374       | 51.273  |
| HIST1H2BL | -0.553 | 0.000   | 18.423    | 27.066   | 10.860       | 19.492  |
| HIST1H2BM | -0.653 | 0.000   | 12.709    | 19.972   | 8.786        | 12.565  |
| HIST1H2BO | -0.520 | 0.001   | 36.021    | 51.693   | 21.437       | 32.950  |
| HIST1H3A  | -0.615 | 0.000   | 52.644    | 80.913   | 27.232       | 37.156  |
| HIST1H3B  | -0.542 | 0.000   | 72.860    | 106.291  | 52.335       | 67.885  |
| HIST1H3C  | -0.518 | 0.000   | 76.349    | 109.585  | 39.590       | 54.293  |
| HIST1H3I  | -0.454 | 0.000   | 29.319    | 40.380   | 16.695       | 19.423  |
| HIST1H3J  | -0.744 | 0.000   | 9.816     | 16.511   | 8.054        | 13.948  |
| HIST1H4A  | -0.521 | 0.001   | 24.013    | 34.572   | 17.599       | 20.490  |
| HIST1H4L  | -0.640 | 0.000   | 17.022    | 26.683   | 13.643       | 19.410  |
| HIST2H3A  | -0.511 | 0.001   | 36.189    | 51.697   | 24.923       | 38.609  |
| HIST2H3C  | -0.511 | 0.001   | 36.189    | 51.697   | 24.923       | 38.609  |



**Supplementary Table 5.** Continued

| Gene_id    | log2FC | P-value | Steatosis | MASH     | Steatosis_sd | MASH_sd  |
|------------|--------|---------|-----------|----------|--------------|----------|
| HJURP      | -0.473 | 0.001   | 18.921    | 26.284   | 13.406       | 14.763   |
| HLA-DMA    | -0.399 | 0.000   | 275.915   | 363.783  | 84.989       | 135.396  |
| HLA-DMB    | -0.473 | 0.000   | 335.965   | 466.424  | 143.313      | 231.756  |
| HLA-DOB    | -0.472 | 0.006   | 19.675    | 27.314   | 13.694       | 18.428   |
| HLA-DQA2   | -0.687 | 0.022   | 84.378    | 135.822  | 79.613       | 124.745  |
| HLA-DQB2   | -0.692 | 0.003   | 9.421     | 15.205   | 9.021        | 13.709   |
| HLA-DRA    | -0.426 | 0.000   | 4147.075  | 5571.623 | 1885.054     | 2889.201 |
| HMGCR      | -0.575 | 0.001   | 2490.131  | 3709.918 | 1779.021     | 3130.654 |
| HMMR       | -0.692 | 0.000   | 40.395    | 65.402   | 28.910       | 44.339   |
| HNRNPA1P33 | -1.236 | 0.000   | 3.372     | 7.962    | 4.533        | 7.578    |
| HOPX       | -0.445 | 0.001   | 21.086    | 28.768   | 12.265       | 15.496   |
| HOXB5      | -0.476 | 0.002   | 5.222     | 7.322    | 3.047        | 3.879    |
| HPCAL4     | -0.839 | 0.006   | 1.346     | 2.422    | 1.841        | 2.318    |
| HPSE       | -0.396 | 0.000   | 86.193    | 113.344  | 34.963       | 50.741   |
| HRAT92     | -0.651 | 0.000   | 10.216    | 16.088   | 7.106        | 9.769    |
| HRCT1      | -0.629 | 0.005   | 5.902     | 9.095    | 5.767        | 8.080    |
| HS3ST2     | -1.829 | 0.000   | 11.242    | 39.973   | 8.409        | 29.329   |
| HSPA6      | -0.461 | 0.000   | 38.405    | 52.890   | 17.576       | 24.363   |
| HSPA7      | -0.530 | 0.000   | 160.815   | 232.119  | 107.247      | 142.142  |
| HTR7       | -0.651 | 0.000   | 30.184    | 47.188   | 17.985       | 27.069   |
| HTRA4      | -0.929 | 0.000   | 2.596     | 4.871    | 3.202        | 3.552    |
| HULC       | -0.650 | 0.000   | 1049.939  | 1647.873 | 829.301      | 892.044  |
| HYAL3      | -0.618 | 0.000   | 90.461    | 139.039  | 33.144       | 48.956   |
| ICOS       | -0.565 | 0.000   | 15.075    | 22.202   | 9.897        | 12.340   |
| IDI1       | -0.607 | 0.000   | 2925.155  | 4454.579 | 1832.900     | 3228.414 |
| IERSL      | -0.466 | 0.000   | 101.290   | 139.865  | 39.469       | 61.046   |
| IFI30      | -0.601 | 0.000   | 806.278   | 1223.496 | 384.254      | 587.606  |
| IFNG-AS1   | -0.408 | 0.013   | 20.346    | 26.784   | 13.524       | 16.395   |
| IGFBPL1    | -0.646 | 0.001   | 15.739    | 24.748   | 13.890       | 18.246   |
| IGFN1      | -0.440 | 0.039   | 16.936    | 14.971   | 46.779       | 13.889   |
| IGLL5      | -0.487 | 0.007   | 265.984   | 372.746  | 180.509      | 284.123  |
| IGSF3      | -0.926 | 0.000   | 58.413    | 110.897  | 31.577       | 65.797   |
| IGSF6      | -0.469 | 0.000   | 176.811   | 244.932  | 87.241       | 113.451  |
| IL20RA     | -0.514 | 0.001   | 16.746    | 23.891   | 8.956        | 17.465   |
| IL2RG      | -0.412 | 0.000   | 80.731    | 107.315  | 23.676       | 38.534   |
| IL32       | -0.653 | 0.000   | 1245.326  | 1957.852 | 879.670      | 1029.633 |
| IL4I1      | -0.613 | 0.000   | 16.634    | 25.382   | 10.229       | 14.918   |
| IQGAP3     | -0.763 | 0.000   | 25.170    | 42.774   | 22.912       | 33.770   |
| IRF4       | -0.527 | 0.000   | 84.234    | 121.122  | 31.022       | 59.103   |
| ISM1       | -0.398 | 0.000   | 267.743   | 352.782  | 113.172      | 117.670  |

**Supplementary Table 5.** Continued

| Gene_id    | log2FC | P-value | Steatosis | MASH     | Steatosis_sd | MASH_sd  |
|------------|--------|---------|-----------|----------|--------------|----------|
| ITGA6      | -0.452 | 0.000   | 1241.459  | 1698.754 | 347.280      | 429.239  |
| ITGAE      | -0.415 | 0.000   | 48.327    | 64.770   | 12.338       | 17.704   |
| ITGAM      | -0.419 | 0.000   | 182.401   | 243.843  | 72.004       | 82.842   |
| ITGAX      | -0.670 | 0.000   | 280.325   | 445.878  | 141.809      | 213.458  |
| ITGBL1     | -0.615 | 0.000   | 243.870   | 373.476  | 154.105      | 290.886  |
| ITIH5      | -0.393 | 0.000   | 126.279   | 165.661  | 48.978       | 77.594   |
| JAKMIP1    | -0.428 | 0.003   | 10.898    | 14.796   | 6.387        | 8.157    |
| JCHAIN     | -0.555 | 0.003   | 930.946   | 1368.026 | 754.015      | 1143.163 |
| KCNJ15     | -0.389 | 0.002   | 84.215    | 110.152  | 61.328       | 70.434   |
| KCNJ16     | -0.452 | 0.002   | 53.150    | 72.528   | 39.900       | 55.784   |
| KCNJ5      | -1.331 | 0.000   | 20.323    | 51.115   | 14.559       | 32.465   |
| KCNN4      | -0.591 | 0.000   | 8.680     | 13.096   | 5.771        | 6.849    |
| KCNS1      | -0.389 | 0.012   | 7.197     | 9.279    | 4.995        | 4.430    |
| KIAA0408   | -0.474 | 0.014   | 51.687    | 71.732   | 35.803       | 61.675   |
| KIAA1211   | -0.493 | 0.000   | 57.905    | 81.251   | 25.124       | 44.569   |
| KIAA1644   | -0.410 | 0.010   | 14.718    | 19.462   | 8.952        | 12.906   |
| KIF18A     | -0.629 | 0.000   | 14.344    | 22.294   | 10.354       | 11.559   |
| KIF18B     | -0.713 | 0.000   | 6.632     | 11.018   | 5.877        | 9.899    |
| KIF20A     | -0.685 | 0.000   | 24.634    | 39.715   | 21.879       | 27.294   |
| KIF23      | -0.539 | 0.001   | 20.582    | 29.979   | 15.651       | 18.389   |
| KIF4A      | -0.652 | 0.000   | 20.548    | 32.402   | 16.723       | 22.794   |
| KIFC1      | -0.554 | 0.000   | 16.359    | 24.069   | 12.399       | 14.512   |
| KLC3       | -0.468 | 0.034   | 2.700     | 3.725    | 2.635        | 2.921    |
| KLHL29     | -0.578 | 0.000   | 99.475    | 148.289  | 43.786       | 75.072   |
| KLHL41     | -0.550 | 0.000   | 43.605    | 46.293   | 93.204       | 24.055   |
| KLHL6      | -0.462 | 0.000   | 136.086   | 187.299  | 35.695       | 66.450   |
| KPNA2      | -0.510 | 0.000   | 169.132   | 241.123  | 77.860       | 88.938   |
| KRT18      | -0.388 | 0.000   | 3509.708  | 4592.106 | 1370.549     | 1369.209 |
| KRT222     | -0.430 | 0.000   | 108.480   | 146.363  | 47.450       | 56.520   |
| KRT7       | -0.653 | 0.000   | 88.338    | 138.903  | 53.131       | 89.240   |
| KRT8       | -0.469 | 0.000   | 4388.618  | 6073.234 | 1767.126     | 1920.031 |
| KRTAP5-AS1 | -1.881 | 0.000   | 1.303     | 4.825    | 2.507        | 4.764    |
| KSR2       | -0.505 | 0.025   | 6.749     | 9.369    | 9.062        | 8.511    |
| LAIR1      | -0.577 | 0.000   | 134.970   | 201.374  | 58.725       | 82.533   |
| LAMA2      | -0.666 | 0.000   | 863.899   | 1370.239 | 303.400      | 824.769  |
| LAMA3      | -0.679 | 0.000   | 307.550   | 492.449  | 154.108      | 188.892  |
| LAMC3      | -0.906 | 0.000   | 248.839   | 466.360  | 156.175      | 312.178  |
| LAMP3      | -0.475 | 0.002   | 22.367    | 30.939   | 16.831       | 18.111   |
| LAMP5      | -0.619 | 0.008   | 3.974     | 6.061    | 3.904        | 5.497    |
| LAPTM5     | -0.408 | 0.000   | 968.330   | 1284.897 | 388.901      | 516.660  |

**Supplementary Table 5.** Continued

| Gene_id      | log2FC | P-value | Steatosis | MASH     | Steatosis_sd | MASH_sd  |
|--------------|--------|---------|-----------|----------|--------------|----------|
| LAX1         | -0.438 | 0.000   | 33.795    | 45.671   | 11.433       | 16.669   |
| LAYN         | -0.418 | 0.004   | 17.861    | 23.768   | 10.744       | 15.975   |
| LCT          | -0.509 | 0.001   | 6.049     | 8.593    | 4.175        | 4.309    |
| LEF1         | -0.633 | 0.000   | 18.928    | 29.159   | 11.076       | 16.050   |
| LEFTY2       | -0.779 | 0.015   | 1.414     | 2.425    | 2.078        | 2.367    |
| LGALS3       | -0.790 | 0.000   | 167.763   | 290.029  | 73.721       | 149.044  |
| LGALS4       | -0.869 | 0.000   | 822.532   | 1502.484 | 770.968      | 1176.540 |
| LGR6         | -0.457 | 0.002   | 23.178    | 31.654   | 18.984       | 18.613   |
| LHFPL2       | -0.405 | 0.000   | 359.791   | 476.242  | 99.475       | 156.938  |
| LHX6         | -0.760 | 0.000   | 18.398    | 31.079   | 11.214       | 15.588   |
| LILRA4       | -0.622 | 0.001   | 7.006     | 10.818   | 5.472        | 7.802    |
| LINC00313    | -0.712 | 0.006   | 3.961     | 6.500    | 5.413        | 6.302    |
| LINC00319    | -0.467 | 0.028   | 12.738    | 17.620   | 12.786       | 16.070   |
| LINC00707    | -0.526 | 0.025   | 2.873     | 4.002    | 3.471        | 2.804    |
| LINC00892    | -0.730 | 0.000   | 3.761     | 6.158    | 3.237        | 4.542    |
| LINC00900    | -0.756 | 0.000   | 3.675     | 6.179    | 3.310        | 4.426    |
| LINC01010    | -0.572 | 0.000   | 14.529    | 21.645   | 10.068       | 12.063   |
| LINC01094    | -0.884 | 0.000   | 11.519    | 21.168   | 6.011        | 13.781   |
| LINC01108    | -0.917 | 0.000   | 2.754     | 5.249    | 2.213        | 3.902    |
| LINC01151    | -0.731 | 0.000   | 5.833     | 9.675    | 5.142        | 6.066    |
| LINC01272    | -0.571 | 0.000   | 13.546    | 20.039   | 7.965        | 9.885    |
| LINC01375    | -0.720 | 0.001   | 2.813     | 4.553    | 2.652        | 3.474    |
| LINC01426    | -0.693 | 0.000   | 15.095    | 24.118   | 12.009       | 13.910   |
| LINC01561    | -0.912 | 0.000   | 3.734     | 6.817    | 3.886        | 5.094    |
| LIPH         | -0.384 | 0.034   | 7.654     | 9.989    | 5.526        | 7.556    |
| LOC100128993 | -0.441 | 0.010   | 4.255     | 5.808    | 3.459        | 2.950    |
| LOC100130899 | -0.560 | 0.004   | 46.441    | 68.469   | 40.531       | 61.000   |
| LOC100287846 | -0.443 | 0.012   | 4.530     | 6.200    | 3.218        | 4.441    |
| LOC100506136 | -0.423 | 0.003   | 10.867    | 14.368   | 6.373        | 6.875    |
| LOC100506895 | -0.581 | 0.035   | 2.696     | 3.954    | 3.413        | 3.508    |
| LOC100996455 | -0.398 | 0.018   | 5.039     | 6.871    | 3.264        | 4.578    |
| LOC101927070 | -0.752 | 0.003   | 2.309     | 3.806    | 2.307        | 3.278    |
| LOC101927156 | -0.612 | 0.001   | 4.487     | 6.745    | 3.737        | 3.995    |
| LOC101927285 | -0.806 | 0.011   | 1.234     | 2.016    | 1.949        | 2.006    |
| LOC101927410 | -0.492 | 0.009   | 4.112     | 5.770    | 3.404        | 3.439    |
| LOC101928105 | -0.661 | 0.002   | 4.420     | 7.122    | 4.160        | 4.795    |
| LOC101928304 | -0.427 | 0.001   | 13.733    | 18.407   | 9.306        | 7.173    |
| LOC101929125 | -0.767 | 0.015   | 0.955     | 1.581    | 1.215        | 1.539    |
| LOC101929331 | -0.566 | 0.001   | 5.576     | 8.287    | 4.334        | 5.480    |
| LOC101929431 | -0.591 | 0.018   | 2.300     | 3.562    | 2.498        | 2.593    |

**Supplementary Table 5.** Continued

| Gene_id      | log2FC | P-value | Steatosis | MASH     | Steatosis_sd | MASH_sd  |
|--------------|--------|---------|-----------|----------|--------------|----------|
| LOC101929450 | -1.031 | 0.000   | 2.214     | 4.274    | 3.452        | 4.107    |
| LOC102724297 | -0.612 | 0.014   | 3.033     | 4.569    | 3.029        | 3.723    |
| LOC158434    | -0.414 | 0.015   | 14.778    | 19.558   | 10.335       | 12.746   |
| LOC284581    | -0.638 | 0.003   | 6.670     | 10.328   | 5.978        | 8.408    |
| LOC653786    | -0.664 | 0.001   | 5.384     | 8.434    | 4.275        | 5.903    |
| LOXL1        | -0.495 | 0.006   | 33.878    | 47.730   | 26.803       | 37.576   |
| LOXL1-AS1    | -0.621 | 0.002   | 3.810     | 5.674    | 3.206        | 3.758    |
| LOXL4        | -0.774 | 0.000   | 103.297   | 176.510  | 44.702       | 170.504  |
| LPL          | -1.886 | 0.000   | 48.686    | 179.756  | 46.883       | 160.175  |
| LRCOL1       | -0.428 | 0.003   | 41.367    | 55.648   | 22.552       | 33.873   |
| LRRC1        | -0.396 | 0.016   | 35.109    | 45.985   | 30.202       | 34.905   |
| LRRC31       | -0.505 | 0.000   | 204.575   | 290.549  | 71.934       | 102.334  |
| LRRC7        | -0.419 | 0.017   | 37.972    | 50.561   | 29.977       | 38.080   |
| LSP1         | -0.429 | 0.000   | 206.858   | 278.461  | 65.425       | 96.300   |
| LTBP2        | -0.785 | 0.000   | 356.132   | 613.642  | 148.647      | 401.758  |
| LUM          | -0.678 | 0.000   | 951.700   | 1522.353 | 636.560      | 1169.323 |
| LXN          | -0.384 | 0.003   | 54.682    | 71.447   | 32.745       | 46.429   |
| LYPD2        | -1.149 | 0.000   | 4.636     | 10.340   | 7.259        | 10.321   |
| LYPD5        | -0.553 | 0.004   | 4.802     | 6.959    | 3.258        | 5.506    |
| LYZ          | -0.678 | 0.000   | 1073.825  | 1717.586 | 553.522      | 1165.510 |
| MACC1        | -0.568 | 0.000   | 63.488    | 93.842   | 34.452       | 46.769   |
| MAD2L1       | -0.612 | 0.000   | 32.143    | 49.220   | 17.229       | 25.320   |
| MAGED4       | -0.513 | 0.015   | 5.478     | 7.670    | 4.689        | 7.116    |
| MAGEL2       | -0.640 | 0.003   | 2.781     | 4.337    | 2.512        | 3.201    |
| MAP1A        | -0.392 | 0.004   | 45.838    | 60.037   | 26.675       | 39.622   |
| MATK         | -0.429 | 0.000   | 57.297    | 77.411   | 20.642       | 27.628   |
| MCM10        | -1.021 | 0.000   | 15.869    | 32.189   | 13.380       | 20.389   |
| MCM2         | -0.944 | 0.000   | 167.954   | 323.234  | 90.332       | 171.475  |
| MCM4         | -0.419 | 0.000   | 489.308   | 654.246  | 105.860      | 186.855  |
| MCM5         | -0.484 | 0.000   | 348.610   | 487.680  | 126.962      | 183.495  |
| MCM6         | -0.685 | 0.000   | 229.015   | 368.338  | 70.186       | 138.631  |
| MCOLN2       | -0.402 | 0.001   | 29.313    | 38.494   | 14.304       | 17.762   |
| MCOLN3       | -0.751 | 0.000   | 10.155    | 16.982   | 7.239        | 10.938   |
| MDFI         | -0.667 | 0.004   | 7.901     | 12.620   | 7.166        | 12.425   |
| ME1          | -0.730 | 0.000   | 434.065   | 720.296  | 229.136      | 466.922  |
| MEI1         | -0.385 | 0.001   | 12.008    | 15.642   | 4.795        | 7.792    |
| MELK         | -0.848 | 0.000   | 14.242    | 25.777   | 14.047       | 15.880   |
| MEP1A        | -0.618 | 0.003   | 3.593     | 5.489    | 2.935        | 4.236    |
| MESP2        | -0.696 | 0.014   | 1.527     | 2.374    | 1.723        | 2.193    |
| MEX3B        | -0.421 | 0.012   | 22.115    | 29.551   | 16.030       | 22.124   |

**Supplementary Table 5.** Continued

| Gene_id   | log2FC | P-value | Steatosis | MASH     | Steatosis_sd | MASH_sd |
|-----------|--------|---------|-----------|----------|--------------|---------|
| MFAP4     | -0.452 | 0.000   | 356.072   | 486.917  | 159.131      | 230.589 |
| MKI67     | -0.630 | 0.000   | 164.267   | 254.378  | 137.462      | 167.752 |
| MMP19     | -0.470 | 0.000   | 51.208    | 70.624   | 23.626       | 27.645  |
| MND1      | -0.705 | 0.003   | 3.100     | 5.054    | 3.041        | 4.239   |
| MOXD1     | -0.792 | 0.000   | 33.489    | 57.840   | 30.639       | 57.561  |
| MRAS      | -0.615 | 0.000   | 175.502   | 268.791  | 58.421       | 94.439  |
| MS4A1     | -0.449 | 0.001   | 46.913    | 63.975   | 28.287       | 34.887  |
| MS4A14    | -0.600 | 0.000   | 29.142    | 44.082   | 14.934       | 18.595  |
| MSN       | -0.444 | 0.000   | 2424.062  | 3298.039 | 725.673      | 956.946 |
| MSR1      | -0.622 | 0.000   | 650.242   | 1000.666 | 316.392      | 582.907 |
| MSTO2P    | -0.513 | 0.013   | 13.976    | 19.848   | 12.992       | 14.516  |
| MTMR11    | -0.417 | 0.001   | 52.507    | 69.820   | 33.517       | 36.874  |
| MYB       | -0.617 | 0.000   | 5.999     | 9.148    | 3.822        | 6.158   |
| MYOZ1     | -0.850 | 0.000   | 8.601     | 8.687    | 29.700       | 8.674   |
| NALCN     | -1.197 | 0.000   | 69.762    | 159.638  | 32.508       | 106.596 |
| NALCN-AS1 | -0.732 | 0.007   | 1.619     | 2.783    | 2.180        | 2.633   |
| NAV3      | -0.435 | 0.001   | 161.346   | 217.870  | 78.634       | 129.288 |
| NCAPG     | -0.706 | 0.000   | 42.910    | 70.110   | 36.520       | 41.370  |
| NCAPH     | -0.686 | 0.000   | 16.915    | 27.280   | 9.734        | 11.936  |
| NCF2      | -0.381 | 0.000   | 179.112   | 233.299  | 65.136       | 92.485  |
| NCR3LG1   | -0.397 | 0.000   | 43.841    | 57.520   | 21.889       | 19.774  |
| NDC80     | -0.791 | 0.000   | 17.420    | 30.239   | 13.042       | 18.278  |
| NEB       | -0.631 | 0.000   | 788.481   | 852.961  | 1874.950     | 492.163 |
| NEIL3     | -0.565 | 0.001   | 6.047     | 9.102    | 4.520        | 6.732   |
| NEK2      | -0.691 | 0.001   | 9.968     | 16.209   | 9.040        | 13.699  |
| NLRP2     | -0.449 | 0.017   | 12.775    | 17.516   | 10.254       | 12.380  |
| NME8      | -0.687 | 0.002   | 2.804     | 4.307    | 3.069        | 2.967   |
| NOS2      | -0.666 | 0.000   | 16.988    | 26.862   | 13.256       | 14.787  |
| NPBWR1    | -0.459 | 0.042   | 28.906    | 39.756   | 24.652       | 31.734  |
| NPM2      | -0.546 | 0.000   | 17.432    | 25.499   | 8.970        | 14.220  |
| NPTX2     | -0.564 | 0.007   | 6.105     | 9.150    | 5.414        | 7.526   |
| NQO1      | -0.468 | 0.000   | 53.789    | 74.366   | 21.339       | 48.016  |
| NRADDP    | -0.452 | 0.026   | 5.757     | 7.916    | 5.755        | 5.124   |
| NRAP      | -0.481 | 0.000   | 49.302    | 47.835   | 118.747      | 28.674  |
| NRG1      | -0.490 | 0.039   | 139.830   | 196.365  | 142.462      | 181.838 |
| NRIP3     | -1.109 | 0.000   | 10.377    | 22.110   | 6.155        | 11.970  |
| NSDHL     | -0.398 | 0.001   | 476.051   | 627.638  | 243.327      | 392.866 |
| NUF2      | -0.617 | 0.001   | 8.795     | 13.505   | 7.325        | 10.271  |
| NUSAP1    | -0.519 | 0.000   | 152.095   | 217.878  | 60.742       | 96.672  |
| OCA2      | -0.611 | 0.003   | 9.015     | 13.770   | 8.456        | 11.672  |

**Supplementary Table 5.** Continued

| Gene_id  | log2FC | P-value | Steatosis | MASH     | Steatosis_sd | MASH_sd  |
|----------|--------|---------|-----------|----------|--------------|----------|
| OR2AE1   | -0.529 | 0.038   | 2.620     | 3.720    | 2.907        | 3.255    |
| ORC1     | -0.869 | 0.000   | 15.787    | 28.891   | 10.803       | 14.466   |
| ORC6     | -0.826 | 0.000   | 9.733     | 17.183   | 6.800        | 10.570   |
| OSCAR    | -0.403 | 0.001   | 16.806    | 22.303   | 7.217        | 11.867   |
| OTOA     | -0.388 | 0.005   | 17.679    | 23.397   | 9.869        | 12.842   |
| P2RY10   | -0.517 | 0.000   | 19.570    | 27.901   | 11.913       | 14.339   |
| PAK3     | -0.461 | 0.009   | 7.135     | 9.865    | 5.054        | 7.436    |
| PAK7     | -0.491 | 0.015   | 5.794     | 8.092    | 4.776        | 8.073    |
| PAQR4    | -0.583 | 0.000   | 36.217    | 54.193   | 16.368       | 25.044   |
| PAQR5    | -0.546 | 0.000   | 66.472    | 96.925   | 30.540       | 44.824   |
| PART1    | -0.636 | 0.006   | 4.070     | 6.240    | 4.522        | 4.648    |
| PBK      | -1.066 | 0.000   | 11.157    | 23.551   | 15.881       | 21.918   |
| PBX4     | -0.577 | 0.013   | 3.004     | 4.470    | 2.729        | 3.345    |
| PCBP3    | -0.414 | 0.021   | 5.526     | 7.361    | 4.567        | 4.487    |
| PCDHA11  | -0.393 | 0.047   | 15.545    | 20.358   | 12.814       | 16.967   |
| PCSK5    | -0.402 | 0.000   | 211.718   | 279.424  | 82.375       | 108.970  |
| PDGFA    | -0.822 | 0.000   | 71.697    | 126.786  | 30.656       | 65.305   |
| PDGFD    | -0.480 | 0.000   | 179.397   | 250.009  | 88.501       | 151.542  |
| PDGFRA   | -0.401 | 0.000   | 1890.530  | 2495.912 | 605.236      | 1055.230 |
| PEG10    | -0.770 | 0.000   | 1158.643  | 1975.449 | 973.077      | 1719.379 |
| PHEX     | -0.580 | 0.001   | 5.982     | 8.815    | 5.268        | 5.178    |
| PIK3IP1  | -0.482 | 0.000   | 290.420   | 405.669  | 88.203       | 146.154  |
| PKMYT1   | -0.664 | 0.000   | 9.301     | 14.883   | 6.437        | 10.541   |
| PLA2G7   | -0.863 | 0.000   | 86.142    | 156.801  | 43.593       | 79.772   |
| PLAU     | -0.440 | 0.000   | 62.791    | 85.023   | 26.230       | 44.831   |
| PLAUR    | -0.491 | 0.000   | 36.147    | 50.833   | 21.390       | 27.838   |
| PLIN2    | -0.423 | 0.000   | 6233.510  | 8354.698 | 3266.123     | 3586.019 |
| PLK4     | -0.437 | 0.000   | 39.625    | 53.709   | 16.647       | 17.665   |
| PLXNC1   | -0.461 | 0.000   | 385.493   | 530.350  | 124.394      | 194.649  |
| PNOC     | -0.631 | 0.002   | 2.855     | 4.316    | 2.566        | 2.867    |
| PODN     | -0.547 | 0.000   | 181.152   | 264.558  | 100.253      | 149.020  |
| POF1B    | -0.380 | 0.013   | 28.123    | 36.556   | 15.537       | 28.994   |
| POLQ     | -0.651 | 0.000   | 40.545    | 63.578   | 27.868       | 27.632   |
| POU2AF1  | -0.473 | 0.003   | 13.379    | 18.506   | 9.511        | 10.829   |
| PPAPDC1A | -0.816 | 0.000   | 12.438    | 21.753   | 7.236        | 11.266   |
| PPP1R27  | -0.428 | 0.048   | 3.513     | 4.667    | 3.635        | 3.851    |
| PRC1     | -0.473 | 0.000   | 73.652    | 102.310  | 34.616       | 45.977   |
| PRKAA2   | -0.425 | 0.003   | 470.023   | 630.869  | 273.061      | 341.750  |
| PRKCE    | -0.621 | 0.000   | 666.002   | 1024.022 | 413.316      | 551.210  |
| PRR36    | -0.825 | 0.005   | 2.505     | 4.434    | 2.590        | 3.844    |

**Supplementary Table 5.** Continued

| Gene_id      | log2FC | P-value | Steatosis | MASH    | Steatosis_sd | MASH_sd |
|--------------|--------|---------|-----------|---------|--------------|---------|
| PTCHD4       | -0.442 | 0.020   | 35.020    | 47.317  | 30.025       | 31.496  |
| PTGES2-AS1   | -0.601 | 0.000   | 7.585     | 11.542  | 5.446        | 5.433   |
| PTGFR        | -0.478 | 0.000   | 119.099   | 165.872 | 60.522       | 74.318  |
| PTPN22       | -0.400 | 0.000   | 92.944    | 122.692 | 34.706       | 47.727  |
| PTPN7        | -0.386 | 0.000   | 67.483    | 88.117  | 24.944       | 29.006  |
| PTPRO        | -0.425 | 0.000   | 82.243    | 110.344 | 39.416       | 51.598  |
| PTTG1        | -0.616 | 0.000   | 18.803    | 28.825  | 13.246       | 21.371  |
| PYGM         | -0.445 | 0.002   | 29.826    | 26.313  | 82.297       | 19.308  |
| QPCT         | -0.434 | 0.001   | 20.768    | 28.163  | 11.455       | 14.204  |
| RAB25        | -1.012 | 0.000   | 5.141     | 10.530  | 4.623        | 10.158  |
| RAB39B       | -0.455 | 0.000   | 10.777    | 14.748  | 5.871        | 6.519   |
| RAD51AP1     | -0.733 | 0.000   | 25.889    | 43.152  | 15.112       | 18.962  |
| RAD54L       | -0.459 | 0.002   | 11.986    | 16.590  | 7.134        | 9.591   |
| RAPGEF4-AS1  | -0.563 | 0.016   | 2.756     | 4.083   | 2.768        | 3.477   |
| RASAL1       | -0.547 | 0.008   | 6.405     | 9.427   | 5.945        | 7.603   |
| RASEF        | -0.936 | 0.000   | 77.105    | 147.456 | 41.730       | 90.342  |
| RASGRF1      | -0.757 | 0.000   | 2.724     | 4.424   | 2.768        | 2.686   |
| RASL11B      | -0.564 | 0.000   | 15.406    | 22.547  | 8.548        | 13.491  |
| RBM20        | -0.737 | 0.000   | 25.124    | 41.725  | 17.933       | 34.217  |
| RDM1         | -0.543 | 0.031   | 2.161     | 3.053   | 2.127        | 2.544   |
| RELB         | -0.453 | 0.000   | 104.567   | 143.210 | 43.021       | 59.197  |
| RFX5         | -0.393 | 0.000   | 551.071   | 723.841 | 131.159      | 167.817 |
| RHCG         | -0.421 | 0.006   | 10.154    | 13.732  | 6.989        | 7.818   |
| RIBC2        | -0.745 | 0.017   | 1.696     | 2.757   | 2.460        | 2.755   |
| RIMS3        | -0.505 | 0.000   | 70.365    | 100.271 | 21.039       | 26.391  |
| RMI2         | -0.867 | 0.000   | 15.408    | 28.131  | 9.504        | 14.889  |
| RNASE1       | -0.576 | 0.000   | 196.675   | 293.180 | 101.633      | 137.493 |
| RNASE6       | -0.480 | 0.000   | 56.456    | 78.732  | 28.067       | 37.441  |
| RNASEH2B-AS1 | -0.605 | 0.036   | 1.239     | 1.889   | 1.476        | 1.884   |
| RNF157       | -0.501 | 0.000   | 49.011    | 69.426  | 30.845       | 31.695  |
| RNF186       | -0.399 | 0.012   | 11.675    | 15.547  | 7.168        | 9.101   |
| ROPN1B       | -0.468 | 0.011   | 7.903     | 11.007  | 6.097        | 7.084   |
| ROS1         | -0.971 | 0.000   | 13.249    | 26.038  | 11.302       | 20.221  |
| RPS6KA1      | -0.445 | 0.000   | 526.047   | 716.441 | 175.331      | 213.610 |
| RPS6KL1      | -0.450 | 0.000   | 83.823    | 114.282 | 39.343       | 41.004  |
| RRAD         | -0.681 | 0.000   | 21.850    | 34.940  | 11.664       | 26.429  |
| RRM2         | -0.595 | 0.000   | 74.026    | 111.886 | 63.512       | 64.671  |
| RS1          | -0.458 | 0.049   | 2.577     | 3.475   | 2.964        | 2.647   |
| RUNX1-IT1    | -0.427 | 0.001   | 22.654    | 30.443  | 12.610       | 13.682  |
| S100A11      | -0.419 | 0.000   | 76.462    | 102.349 | 31.260       | 43.544  |

**Supplementary Table 5.** Continued

| Gene_id   | log2FC | P-value | Steatosis | MASH      | Steatosis_sd | MASH_sd   |
|-----------|--------|---------|-----------|-----------|--------------|-----------|
| S100A14   | -0.397 | 0.000   | 76.543    | 101.117   | 30.577       | 37.485    |
| SAMD11    | -0.551 | 0.000   | 79.722    | 116.683   | 40.962       | 64.535    |
| SAMD13    | -0.487 | 0.004   | 6.632     | 9.160     | 4.548        | 5.849     |
| SAXO2     | -0.466 | 0.008   | 15.045    | 20.677    | 10.899       | 19.000    |
| SCAMP5    | -0.501 | 0.011   | 114.741   | 162.491   | 82.146       | 119.592   |
| SCD       | -0.687 | 0.000   | 45405.672 | 73122.528 | 35303.564    | 52519.003 |
| SCG3      | -0.391 | 0.003   | 14.948    | 19.516    | 9.180        | 7.704     |
| SCHIP1    | -0.672 | 0.004   | 43.437    | 69.214    | 38.077       | 46.027    |
| SCIN      | -1.398 | 0.000   | 4.288     | 11.034    | 5.437        | 9.188     |
| SDCBP2    | -0.735 | 0.000   | 84.202    | 140.308   | 37.247       | 70.103    |
| SEL1L3    | -0.381 | 0.000   | 543.904   | 708.444   | 151.658      | 232.819   |
| SEMA3E    | -0.434 | 0.004   | 28.707    | 38.697    | 19.765       | 37.080    |
| SEMA7A    | -0.418 | 0.000   | 34.543    | 45.972    | 16.373       | 18.023    |
| SERPINB8  | -0.626 | 0.000   | 139.746   | 215.518   | 51.791       | 82.782    |
| SERPINE3  | -0.433 | 0.046   | 4.250     | 5.753     | 3.534        | 4.645     |
| SEZ6L2    | -0.534 | 0.007   | 9.599     | 13.949    | 9.886        | 12.288    |
| SFRP5     | -0.389 | 0.005   | 138.301   | 181.152   | 106.830      | 97.083    |
| SIGLEC8   | -0.895 | 0.000   | 13.336    | 24.936    | 8.637        | 17.478    |
| SIRPG-AS1 | -0.482 | 0.024   | 3.556     | 4.853     | 3.545        | 3.309     |
| SIT1      | -0.562 | 0.000   | 14.250    | 21.042    | 7.582        | 10.662    |
| SKA1      | -1.063 | 0.000   | 5.625     | 11.817    | 5.299        | 8.487     |
| SLA2      | -0.408 | 0.000   | 39.643    | 52.424    | 19.116       | 16.132    |
| SLAMF7    | -0.593 | 0.000   | 132.682   | 200.147   | 43.551       | 78.191    |
| SLAMF8    | -0.562 | 0.000   | 54.282    | 80.043    | 23.948       | 39.120    |
| SLC12A3   | -0.503 | 0.049   | 2.331     | 3.297     | 2.879        | 2.802     |
| SLC16A11  | -0.446 | 0.001   | 69.360    | 94.520    | 36.061       | 59.018    |
| SLC1A3    | -0.797 | 0.000   | 96.157    | 166.947   | 56.251       | 93.623    |
| SLC22A11  | -0.673 | 0.001   | 15.051    | 24.001    | 13.327       | 18.328    |
| SLC22A15  | -0.388 | 0.001   | 31.845    | 41.344    | 14.177       | 25.213    |
| SLC22A2   | -0.552 | 0.013   | 2.872     | 4.234     | 3.076        | 3.037     |
| SLC25A53  | -0.405 | 0.005   | 10.765    | 14.157    | 6.068        | 7.002     |
| SLC2A14   | -0.886 | 0.000   | 15.350    | 28.449    | 13.540       | 14.881    |
| SLC2A5    | -0.526 | 0.007   | 5.188     | 7.343     | 4.411        | 6.361     |
| SLC35F2   | -0.384 | 0.003   | 17.868    | 23.184    | 9.571        | 11.718    |
| SLC38A5   | -0.409 | 0.024   | 6.000     | 8.012     | 4.816        | 5.308     |
| SLC44A3   | -0.399 | 0.002   | 121.220   | 159.864   | 49.478       | 84.470    |
| SLC51B    | -0.800 | 0.003   | 5.141     | 9.037     | 8.996        | 8.276     |
| SLC6A19   | -0.598 | 0.001   | 47.660    | 72.113    | 33.178       | 51.710    |
| SLC6A8    | -0.456 | 0.000   | 24.859    | 34.046    | 12.673       | 15.392    |
| SLC7A14   | -0.902 | 0.000   | 6.132     | 11.421    | 4.828        | 7.685     |



**Supplementary Table 5.** Continued

| Gene_id     | log2FC | P-value | Steatosis | MASH     | Steatosis_sd | MASH_sd  |
|-------------|--------|---------|-----------|----------|--------------|----------|
| SLIT2       | -0.588 | 0.000   | 129.780   | 194.988  | 41.879       | 106.166  |
| SNAP25-AS1  | -0.522 | 0.003   | 17.046    | 24.430   | 11.187       | 23.101   |
| SNX20       | -0.392 | 0.000   | 39.050    | 51.234   | 15.170       | 17.687   |
| SORT1       | -0.412 | 0.009   | 320.556   | 426.389  | 302.985      | 410.735  |
| SOX4        | -0.427 | 0.000   | 131.751   | 176.979  | 62.365       | 97.633   |
| SOX9        | -0.542 | 0.000   | 93.621    | 136.232  | 59.934       | 75.078   |
| SPC24       | -0.895 | 0.000   | 4.385     | 8.265    | 4.738        | 6.396    |
| SPHK1       | -0.485 | 0.000   | 21.771    | 30.438   | 12.682       | 17.585   |
| SPINT1      | -0.535 | 0.000   | 46.229    | 66.994   | 27.512       | 39.111   |
| SPINT2      | -0.406 | 0.000   | 195.032   | 258.458  | 83.943       | 140.045  |
| SPOCD1      | -1.549 | 0.000   | 1.787     | 4.761    | 2.852        | 4.551    |
| SPP1        | -1.448 | 0.000   | 223.421   | 609.617  | 195.754      | 501.769  |
| SPTA1       | -0.590 | 0.022   | 2.872     | 4.379    | 3.617        | 3.776    |
| SQLE        | -0.831 | 0.000   | 1294.810  | 2303.580 | 1262.358     | 2258.588 |
| SRXN1       | -0.431 | 0.000   | 503.424   | 679.203  | 148.215      | 226.203  |
| ST14        | -0.527 | 0.000   | 179.633   | 258.977  | 79.594       | 117.611  |
| ST6GALNAC1  | -0.734 | 0.000   | 8.033     | 13.153   | 6.078        | 7.772    |
| ST8SIA1     | -0.439 | 0.002   | 17.910    | 24.050   | 10.761       | 14.522   |
| STRIP2      | -0.448 | 0.000   | 19.902    | 27.033   | 8.829        | 11.554   |
| STXBPL      | -0.651 | 0.042   | 1.485     | 2.221    | 2.263        | 2.137    |
| STYK1       | -0.430 | 0.046   | 5.292     | 6.964    | 6.517        | 4.935    |
| SUSD2       | -0.591 | 0.000   | 46.183    | 69.478   | 28.416       | 53.016   |
| SV2A        | -0.383 | 0.000   | 21.122    | 27.504   | 9.030        | 11.671   |
| SYT13       | -0.672 | 0.000   | 22.563    | 35.864   | 21.285       | 30.542   |
| TAS2R60     | -0.547 | 0.008   | 8.917     | 12.941   | 8.342        | 10.920   |
| TCF19       | -0.798 | 0.000   | 74.466    | 129.484  | 36.320       | 57.530   |
| TCL1A       | -0.582 | 0.002   | 6.672     | 9.921    | 4.674        | 7.206    |
| TDRD15      | -0.430 | 0.005   | 379.628   | 511.080  | 287.124      | 277.034  |
| TGFBI       | -0.406 | 0.000   | 3962.533  | 5251.740 | 1316.819     | 1645.361 |
| THBS2       | -0.763 | 0.000   | 500.129   | 848.862  | 338.883      | 796.717  |
| THRA1/BTR   | -0.644 | 0.002   | 4.402     | 6.696    | 3.565        | 4.848    |
| THY1        | -0.731 | 0.000   | 77.556    | 128.737  | 54.742       | 115.580  |
| TIAM2       | -0.531 | 0.004   | 9.540     | 13.910   | 6.902        | 12.241   |
| TIFAB       | -0.408 | 0.018   | 7.119     | 9.310    | 5.065        | 5.773    |
| TIGAR       | -0.619 | 0.000   | 97.593    | 149.804  | 44.452       | 66.016   |
| TK1         | -0.605 | 0.000   | 64.234    | 97.902   | 36.107       | 47.945   |
| TLR7        | -0.584 | 0.000   | 64.791    | 96.960   | 34.497       | 52.599   |
| TM4SF19     | -2.103 | 0.000   | 5.351     | 22.819   | 7.914        | 21.466   |
| TM4SF19-AS1 | -0.907 | 0.000   | 6.863     | 12.466   | 7.396        | 11.226   |
| TM6SF1      | -0.525 | 0.000   | 42.190    | 60.542   | 20.358       | 28.079   |

**Supplementary Table 5.** Continued

| Gene_id   | log2FC | P-value | Steatosis | MASH     | Steatosis_sd | MASH_sd  |
|-----------|--------|---------|-----------|----------|--------------|----------|
| TMC4      | -0.564 | 0.000   | 19.122    | 28.379   | 11.648       | 21.627   |
| TMEM119   | -0.442 | 0.019   | 22.681    | 30.810   | 16.162       | 30.520   |
| TMEM144   | -0.409 | 0.000   | 86.024    | 114.216  | 36.484       | 47.158   |
| TMEM154   | -1.000 | 0.000   | 403.208   | 806.343  | 340.743      | 569.767  |
| TMEM178B  | -0.686 | 0.000   | 9.793     | 15.704   | 7.958        | 14.797   |
| TMEM200A  | -0.901 | 0.000   | 13.241    | 24.575   | 7.515        | 21.685   |
| TMEM255A  | -0.789 | 0.000   | 19.716    | 33.989   | 10.210       | 16.161   |
| TMEM45B   | -0.570 | 0.000   | 574.607   | 852.857  | 328.226      | 514.788  |
| TMEM54    | -0.438 | 0.000   | 36.120    | 49.127   | 16.689       | 20.615   |
| TNF       | -0.588 | 0.000   | 20.387    | 30.629   | 10.548       | 15.549   |
| TNFRSF11A | -0.403 | 0.000   | 60.694    | 80.208   | 19.439       | 32.006   |
| TNFRSF12A | -1.324 | 0.000   | 44.914    | 112.661  | 38.516       | 91.925   |
| TNFRSF17  | -0.410 | 0.005   | 11.271    | 14.807   | 7.158        | 8.285    |
| TNFRSF4   | -0.504 | 0.003   | 5.873     | 8.387    | 4.469        | 4.471    |
| TNFRSF9   | -0.663 | 0.000   | 12.127    | 18.996   | 6.279        | 10.589   |
| TNFSF15   | -0.485 | 0.000   | 39.951    | 55.868   | 16.558       | 24.871   |
| TOP2A     | -0.722 | 0.000   | 139.680   | 230.639  | 135.742      | 162.762  |
| TP53I3    | -0.650 | 0.000   | 213.940   | 335.749  | 115.381      | 159.892  |
| TP73      | -0.417 | 0.001   | 36.645    | 48.722   | 19.363       | 24.035   |
| TRAT1     | -0.488 | 0.000   | 22.882    | 32.104   | 12.663       | 17.053   |
| TREM2     | -1.944 | 0.000   | 20.316    | 78.256   | 18.042       | 64.461   |
| TREML1    | -0.455 | 0.023   | 3.831     | 5.085    | 3.308        | 3.364    |
| TREML2    | -0.513 | 0.001   | 5.037     | 7.221    | 3.676        | 3.799    |
| TRIM31    | -1.096 | 0.000   | 11.123    | 23.877   | 20.783       | 23.225   |
| TRIM59    | -0.382 | 0.000   | 42.764    | 55.803   | 17.326       | 17.184   |
| TROAP     | -0.507 | 0.014   | 8.513     | 11.848   | 6.694        | 11.377   |
| TRPC4     | -0.485 | 0.014   | 6.735     | 9.302    | 5.858        | 6.914    |
| TRPV2     | -0.385 | 0.000   | 138.643   | 181.237  | 39.043       | 58.391   |
| TTC24     | -0.591 | 0.032   | 1.665     | 2.557    | 2.133        | 2.358    |
| TTC9      | -1.132 | 0.000   | 44.926    | 98.493   | 26.554       | 60.738   |
| TTK       | -0.843 | 0.000   | 14.916    | 26.913   | 12.880       | 17.288   |
| TTN       | -0.441 | 0.000   | 5928.634  | 5004.910 | 17464.185    | 2943.600 |
| TUBA1B    | -0.394 | 0.000   | 2344.077  | 3080.844 | 923.208      | 1168.128 |
| TUBA1C    | -0.382 | 0.000   | 551.559   | 718.969  | 222.930      | 247.156  |
| TUBA4B    | -0.626 | 0.017   | 1.832     | 2.791    | 1.846        | 2.712    |
| TYMS      | -0.669 | 0.000   | 59.178    | 94.126   | 39.082       | 45.597   |
| TYMSOS    | -0.582 | 0.001   | 14.247    | 21.229   | 9.831        | 11.730   |
| TYROBP    | -0.381 | 0.000   | 154.002   | 200.699  | 59.172       | 86.637   |
| UBD       | -0.770 | 0.000   | 775.746   | 1322.444 | 738.641      | 947.867  |
| UBE2C     | -0.563 | 0.002   | 9.004     | 13.540   | 8.138        | 9.769    |

**Supplementary Table 5.** Continued

| Gene_id    | log2FC | P-value | Steatosis | MASH     | Steatosis_sd | MASH_sd |
|------------|--------|---------|-----------|----------|--------------|---------|
| UBE2T      | -0.760 | 0.000   | 12.192    | 20.862   | 8.072        | 11.058  |
| UBXN10     | -0.534 | 0.001   | 406.305   | 588.210  | 262.050      | 385.517 |
| UHRF1      | -0.784 | 0.000   | 36.601    | 62.837   | 26.316       | 33.111  |
| ULBP2      | -0.417 | 0.030   | 4.145     | 5.575    | 3.574        | 3.542   |
| UNC5B      | -0.386 | 0.000   | 224.658   | 293.502  | 61.826       | 114.375 |
| USH1C      | -0.621 | 0.000   | 16.042    | 24.584   | 10.170       | 18.806  |
| VCAN       | -0.552 | 0.000   | 441.747   | 647.685  | 379.857      | 518.350 |
| VENTX      | -0.398 | 0.008   | 9.373     | 12.380   | 5.839        | 7.406   |
| VEPH1      | -0.428 | 0.001   | 53.488    | 71.594   | 24.473       | 43.130  |
| VTCN1      | -0.427 | 0.025   | 20.089    | 27.081   | 23.424       | 19.969  |
| WBSCR17    | -0.771 | 0.000   | 9.376     | 15.933   | 7.874        | 14.991  |
| WDHD1      | -0.607 | 0.000   | 62.450    | 95.007   | 21.514       | 33.732  |
| WDR76      | -0.432 | 0.000   | 65.002    | 87.497   | 24.071       | 32.144  |
| WIPI1      | -0.450 | 0.000   | 302.680   | 413.777  | 93.344       | 109.267 |
| WNT4       | -0.635 | 0.000   | 41.826    | 64.800   | 19.261       | 36.387  |
| XK         | -0.523 | 0.000   | 65.911    | 94.866   | 38.879       | 50.904  |
| ZBED2      | -0.420 | 0.012   | 6.981     | 9.195    | 5.167        | 5.179   |
| ZBTB33     | -0.420 | 0.000   | 1291.337  | 1727.296 | 490.872      | 581.773 |
| ZMAT3      | -0.449 | 0.000   | 1626.996  | 2220.952 | 785.747      | 952.973 |
| ZNF367     | -0.639 | 0.000   | 170.291   | 265.123  | 64.414       | 116.625 |
| ZNF528-AS1 | -0.468 | 0.003   | 4.584     | 6.381    | 3.322        | 3.046   |
| ZNF541     | -0.465 | 0.005   | 5.959     | 8.183    | 4.476        | 4.706   |
| ZNF683     | -1.253 | 0.000   | 2.127     | 5.159    | 2.452        | 4.573   |
| ZNF724P    | -0.550 | 0.000   | 5.732     | 8.306    | 3.600        | 4.294   |
| ZNF826P    | -0.700 | 0.006   | 1.821     | 2.938    | 1.961        | 2.657   |
| ZPLD1      | -0.518 | 0.027   | 5.466     | 7.727    | 6.531        | 7.662   |
| ZWINT      | -0.750 | 0.000   | 47.440    | 80.052   | 26.897       | 39.043  |
